# Supplementary material
Source: Springer Nature journal article supplement (https://www.springermedizin.de/resource/supplementary/12958_2005_288_MOESM2_ESM.pdf/9567664)

**A**

```

      10      20      30      40      50      60      70      80      90     100
Zebrafish MSSGVLGRSLSTLTLTSLQQLQPLPHLS---NWLRLPRRQATVHASEVPSLFRPEYILSGYRVPVHQEWRSYFCSLFQCHNELLNVWTHLLAIPAVLLQFS
Catfish   MSSGVLGRSLSTLTLNIKQVGLPHLS---PSLHSLPSLQATVEVSNVPSLFRPEYIQSGYRVPVGPQWHCYALSLFORHNELLNWSHLLGVPVLLRFW
Trout     MTSGALGRSLSTLTLVSRQLSRLPHLSDVLPSSLSLSPSPSPPTVPVSCVPTLTFQEPYILSGYRVPVGPQDWRCYILSLFORHNESLNWTHLLAGPLVLLRVW

      110     120     130     140     150     160     170     180     190     200
Zebrafish FFAGAWGLTLNLASLPLFLYVLSSILTYLSFVA AHLQSHSELAHYSLFFVDYVGVAVYQYGC SMGHYFCSEPEWRHSIVGVFLPGAAMLAWLSCASC
Catfish   LFAATRSLTLDASSLPLFLVLTLSALTYLTCSTLAHLQSHSELSHYSLFFLDYVGVAVYQYGSALAHYFCAEEFWKQSLVGALFLPGAALLGWLSCASC
Trout     AYG---LSLDSASLPLCLYILSALTYLCCSVA AHLQSHSELAHYTLFFLDYVGVSVYQYGC SLAHYFCSEPAWRESVPGFWFLPGAALLGWLSCANC

      210     220     230     240     250     260     270     280     290     300
Zebrafish CYSKFRYRRPYFFHRKICQIIP TSLAVLLDISPVAHRL LTKSN-DEPVLV FHAMQVAFFLLAALFFS CPVPERFFPGRCDIVGHGHQIFHIFLVLC TMCQ
Catfish   CFAKLHYRRPYPLRRKIFQIVP TSLAYMLDISPVALRLARRPC-HEPVLV LHALQVAFFLMAAFFS CPVPERFFPGKCDIVGHGHQIFHIFLV MCTMCQ
Trout     CFAKSRYRRPYPLRRKICQIIP TSMAYFLDISPVAHRLA TPVWGQDPALPHALQMAAFFLLA AFFS CPVPERFFPGHCDIMGQGHQIFHIFLSLCTLCQ

      310     320     330     340     350     360
Zebrafish LEAMFRDFLVH---QOSVVD AHGEHFILLAGGSFFLIVLCSILTAVLMRGA VQRQLRKKD---
Catfish   MEAVFKDFLVQ---RSIVVHVHGEWSLWLVAGSFFVLVLC SILTAAARMRQRVQRQLQKERLKSE
Trout     LEALFPKTMVAGGRYSACNL YGERQLWFAGVSEFALALCSTLTA VMRRHVQRLEKSETVKQ

```

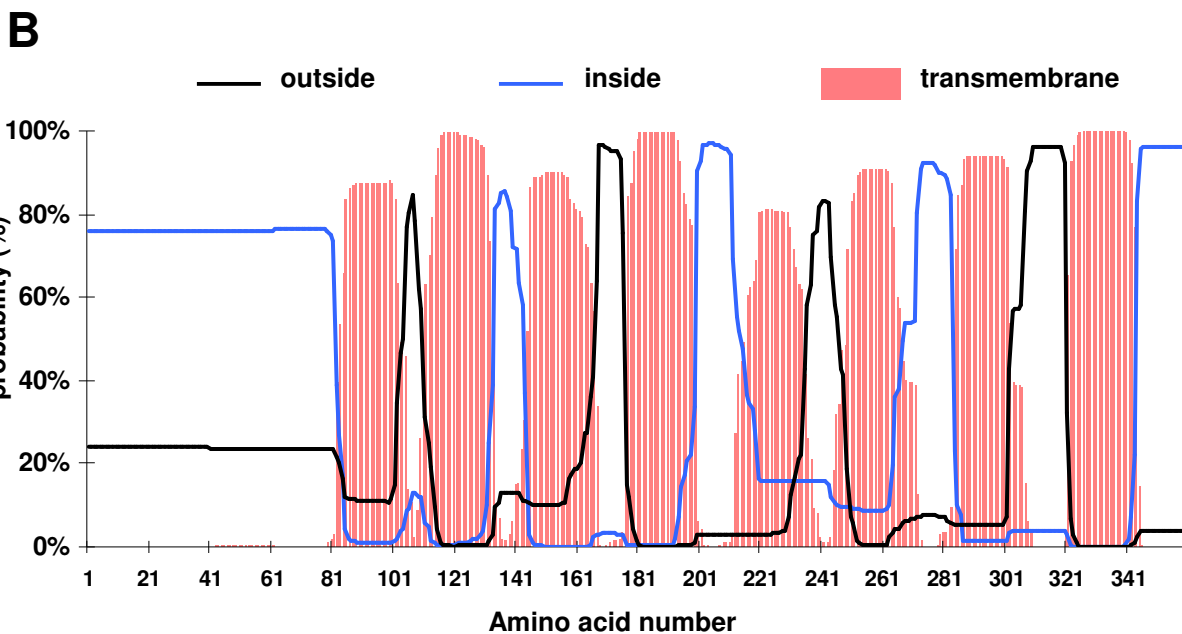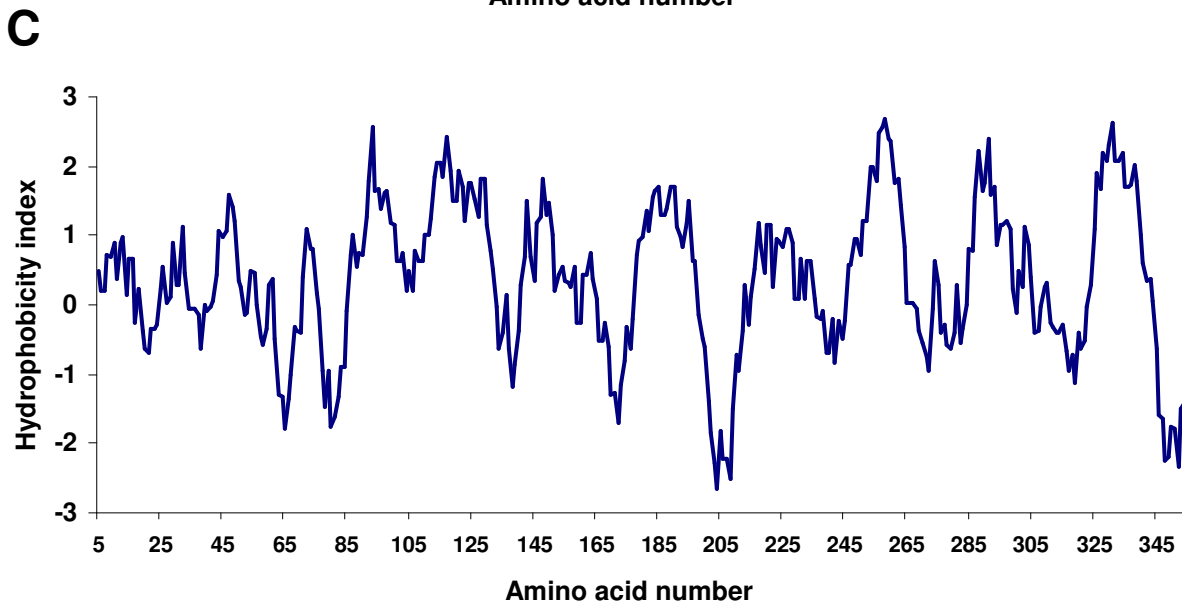

Supplement: MOESM2 [file 9567664]
